# Supplementary material for: Doxycycline-Eluting Core-Shell Type Nanofiber-Covered Trachea Stent for Inhibition of Cellular Metalloproteinase and Its Related Fibrotic Stenosis
Source: Pharmaceutics. 2019 Aug 19;11(8):421. doi: 10.3390/pharmaceutics11080421 (PMC6723391; doi:10.3390/pharmaceutics11080421)
Supplement: Supplementary file 1 [file pharmaceutics-11-00421-s001.pdf]

# Supplementary Materials: Doxycycline-Eluting Core-Shell Type Nanofiber-Covered Trachea Stent for Inhibition of Cellular Metalloproteinase and Its Related Fibrotic Stenosis

Rengarajan Baskaran, Un-Jeong Ko, Enkhzaya Davaa, Ji-Eun Park, Yixin Jiang, Junghan Lee and Su-Geun Yang \*

## Tissue MMP inhibition of doxy-releasing nanofiber

All animal care and experimental procedures were conducted in accordance with the guidance for Experimental Animal Research Committee of Inha University. HT1080 fibrosarcoma cells ( $5.0 \times 10^6$  cells in 100  $\mu$ L) were subcutaneously injected on the flank side of female BALB/C nude mice (Orient Co., Korea). When the tumors grew to an average diameter of 10 mm, 10% doxy containing nanofiber membranes and blank membranes were sub-tumorally implanted under the tumor. After 2 weeks of implantation, tumor tissues were recovered and subjected to H&E histological assay and MMP RNA assay.

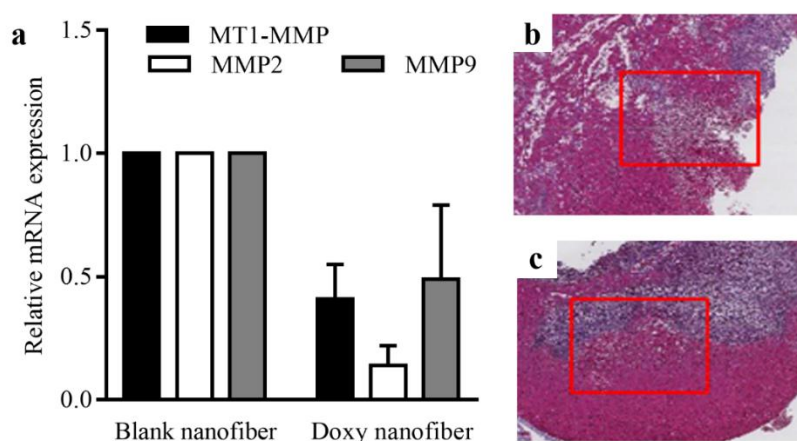

**Figure S1.** Tissue histologies and mRNA level of MMPs in HT1080 fibrosarcoma xenograft models. The tumors after 2 weeks of sutumoral membrane implantation (blank nanofiber membrane and doxy-eluting nanofiber membranes) were recovered for mRNA assay (a) and histological observation (b and c).

**Table S1.** The primer sequence of MMPs for RT-PCR study.

| Gene           | Primers (5'-3')                                                     | Product Size (bp) |
|----------------|---------------------------------------------------------------------|-------------------|
| MMP-2          | Forward: GGCCCTGTCACTCCTGAGAT<br>Reverse: GGCATCCAGGTTATCGGGGA      | 120               |
| MMP-9          | Forward: CAACATCACCTATTGGATCC<br>Reverse: CGGGTGTAGAGTCTCTCGCT      | 100               |
| MT1-MMP        | Forward: GCTTGCAAGTAACAGGCAAA<br>Reverse: AAATCTCTCCGTGTCCATCCA     | 589               |
| $\beta$ -actin | Forward: GGAAATCGTGCGTGACATTAAGG<br>Reverse: GGCTTTTAGGATGGCAAGGGAC | 700               |

**Table S2.** Kinetic modeling on doxycycline release from core-shell fibers (1:2 and 1:4).

| Core-Shell (1:2) |                |        |         |           |
|------------------|----------------|--------|---------|-----------|
|                  | r <sup>2</sup> | RMSE   | Slope   | Intercept |
| Zero order       | 0.7376         | 4.2090 | 2.5685  | 60.544    |
| First order      | 0.7898         | 0.0531 | -0.0375 | 1.5972    |
| Higuchi          | 0.8552         | 3.1264 | 10.828  | 50.412    |
| Korsmeyer-Peppas | 0.8520         | 0.3533 | 2.44    | 0.0063    |
| Hixson-Crowell   | 0.7248         | 0.0865 | 0.0511  | -0.7161   |

  

| Core-Shell (1:4) |                |        |         |           |
|------------------|----------------|--------|---------|-----------|
|                  | r <sup>2</sup> | RMSE   | Slope   | Intercept |
| Zero order       | 0.9258         | 2.8398 | 3.651   | 40.066    |
| First order      | 0.9681         | 0.0182 | -0.0364 | 1.7903    |
| Higuchi          | 0.9851         | 1.2735 | 14.744  | 26.979    |
| Korsmeyer-Peppas | 0.8688         | 0.3430 | 2.5406  | -0.1587   |
| Hixson-Crowell   | 0.8988         | 0.0785 | 0.0851  | -1.2034   |
